# Supplementary material for: Transmission Dynamics of Corynebacterium spp. Within Two Danish Dairy Cattle Herds
Source: PubMed Central journal article supplement (PMC8419450; doi:10.3389/fvets.2021.735345), 2021-08-23
Supplement: Data_Sheet_1.pdf [file Data_Sheet_1.pdf]

SUPPLEMENTARY INFORMATION

Table S1. *Corynebacterium* spp. records and results from Herd 1, showing the numbers of susceptible and infected quarters, and the numbers of newly infected and recovered quarters per time interval.

| Date       | Susceptible quarters | Infected quarters | New quarter infections | Recovered quarters |
|------------|----------------------|-------------------|------------------------|--------------------|
| 16-01-2017 | 271                  | 98                | -                      | -                  |
| 13-02-2017 | 358                  | 84                | 31                     | 55                 |
| 14-03-2017 | 369                  | 81                | 22                     | 18                 |
| 10-04-2017 | 269                  | 152               | 76                     | 17                 |
| 08-05-2017 | 269                  | 169               | 47                     | 43                 |
| 12-06-2017 | 376                  | 76                | 8                      | 85                 |
| 10-07-2017 | 377                  | 52                | 8                      | 29                 |
| 14-08-2017 | 323                  | 100               | 48                     | 9                  |
| 11-09-2017 | 328                  | 54                | 8                      | 46                 |
| 09-10-2017 | 274                  | 86                | 19                     | 8                  |
| 13-11-2017 | 220                  | 137               | 51                     | 25                 |
| 11-12-2017 | 281                  | 77                | 2                      | 42                 |

Table S2 *Corynebacterium* spp. records and results from Herd 2, showing the numbers of susceptible and infected quarters, and the numbers of newly infected and recovered quarters per time interval.

| Date       | Susceptible quarters | Infected quarters | Newly Infected quarters | Recovered quarters |
|------------|----------------------|-------------------|-------------------------|--------------------|
| 06-02-2017 | 496                  | 31                | -                       | -                  |
| 06-03-2017 | 703                  | 140               | 78                      | 15                 |
| 03-04-2017 | 850                  | 80                | 18                      | 69                 |
| 01-05-2017 | 764                  | 168               | 68                      | 14                 |
| 06-06-2017 | 860                  | 76                | 19                      | 96                 |
| 03-07-2017 | 804                  | 98                | 33                      | 26                 |
| 07-08-2017 | 800                  | 167               | 77                      | 30                 |
| 04-09-2017 | 822                  | 150               | 56                      | 72                 |
| 02-10-2017 | 931                  | 81                | 17                      | 70                 |
| 06-11-2017 | 860                  | 158               | 70                      | 22                 |
| 04-12-2017 | 935                  | 107               | 50                      | 104                |
| 08-01-2018 | 830                  | 53                | 22                      | 50                 |
